# Supplementary material for: Signaling Modulations of miR-206-3p in Tooth Morphogenesis
Source: MDPI journal article supplement (doi:10.3390/ijms21155251), 2020-07-24
Supplement: s1 [file s1]

# Signaling modulations of miRNA 206-3p in tooth morphogenesis

Sanjiv Neupane<sup>1, 6\*</sup>, Yam Prasad Aryal<sup>1</sup>, Tae-Young Kim<sup>1</sup>, Chang-Yeol Yeon<sup>1</sup>, Chang-Hyeon An<sup>2</sup>, Ji-Youn Kim<sup>3</sup>, Hitoshi Yamamoto<sup>4</sup>, Youngkyun Lee<sup>1</sup>, Wern-Joo Sohn<sup>5</sup>, Jae-Young Kim<sup>1\*</sup>

<sup>1</sup>Department of Biochemistry, School of Dentistry, Kyungpook National University, Daegu, Korea; [sanjiv.knu@gmail.com](mailto:sanjiv.knu@gmail.com) (S.N.); [yamaryal@yahoo.com](mailto:yamaryal@yahoo.com) (Y.P.A.); [tae09290@daum.net](mailto:tae09290@daum.net) (T.Y.K.); [yhs2669@naver.com](mailto:yhs2669@naver.com) (C.Y.Y.); [jkim91@knu.ac.kr](mailto:jkim91@knu.ac.kr) (J.Y.K)

<sup>2</sup>Department of Oral and Maxillofacial Radiology, School of Dentistry, Kyungpook National University, Daegu, Korea; [chan@knu.ac.kr](mailto:chan@knu.ac.kr)

<sup>3</sup>Department of Dental Hygiene, College of Health Science, Gachon University, Incheon, Korea; [hoho6434@gachon.ac.kr](mailto:hoho6434@gachon.ac.kr)

<sup>4</sup>Department of Histology and Developmental Biology, Tokyo Dental College, Tokyo, Japan; [hyamamoto@tdc.ac.jp](mailto:hyamamoto@tdc.ac.jp)

<sup>5</sup>Pre-Major of Cosmetics and Pharmaceutics, Daegu Haany University, Gyeongsan, Korea; [undine75@gmail.com](mailto:undine75@gmail.com)

<sup>6</sup>Department of Biochemistry and Cell Biology, Stony Brook University, 450 Life Science Building, 370 Center for Molecular Medicine, Stony Brook, NY 11794-5215; [sanjiv.neupane@stonybrook.edu](mailto:sanjiv.neupane@stonybrook.edu)

Correspondence:

Jae-Young Kim, Ph.D.,

Department of Biochemistry, School of Dentistry, IHBR, Kyungpook National University, 2177 Dalgubeol-daero (41940), Jung-gu, Daegu, Republic of Korea

Tel: 82-53-420-4998, Fax: 82-53-421-4276, E-mail: [jkim91@knu.ac.kr](mailto:jkim91@knu.ac.kr)

Sanjiv Neupane, Ph.D.

Department of Biochemistry, School of Dentistry, IHBR, Kyungpook National University, 2177 Dalgubeol-daero (41940), Jung-gu, Daegu, Republic of Korea

Email: [sanjiv.knu@gmail.com](mailto:sanjiv.knu@gmail.com), [sanjiv.neupane@stonybrook.edu](mailto:sanjiv.neupane@stonybrook.edu)

Current address: Department of Biochemistry and Cell Biology, Stony Brook University, 450 Life Science Building, 370 Centers for Molecular Medicine, Stony Brook, NY 11794-5215

## Supplementary materials

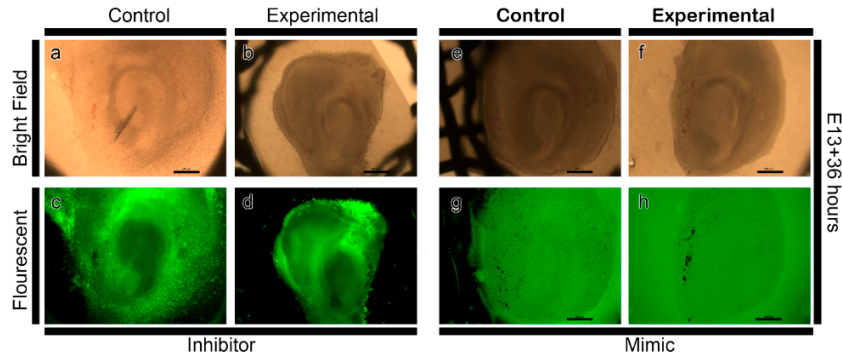

**Supplementary Figure S1. Evaluation of the efficiency of inhibitor/mimic transfection during *in vitro* organ cultivation**

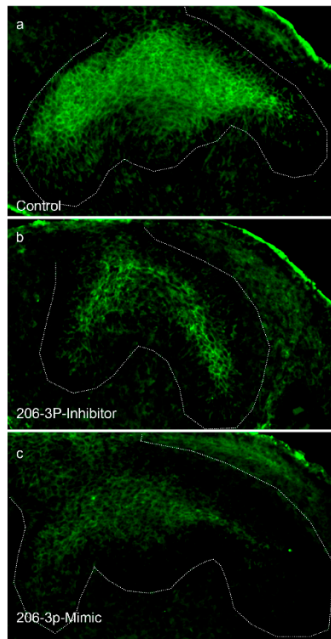

**Supplementary Figure S2. Localization of E-Cadherin in E13+2 day teeth**

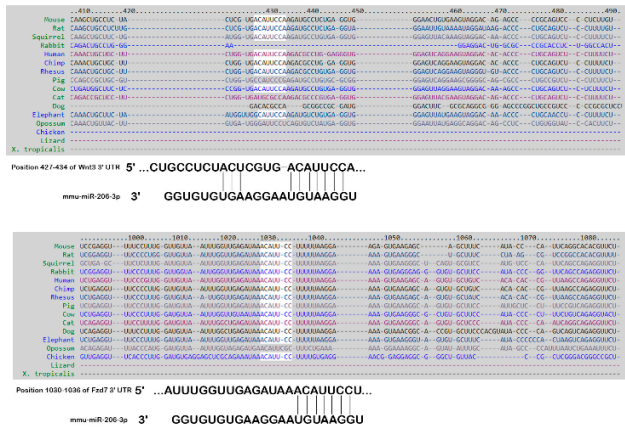

**Supplementary Figure S3.** The putative binding sites of mmu-miR-206-3P are broadly conserved among the Wnt3 and Fzd7 3' UTRs of vertebrates.

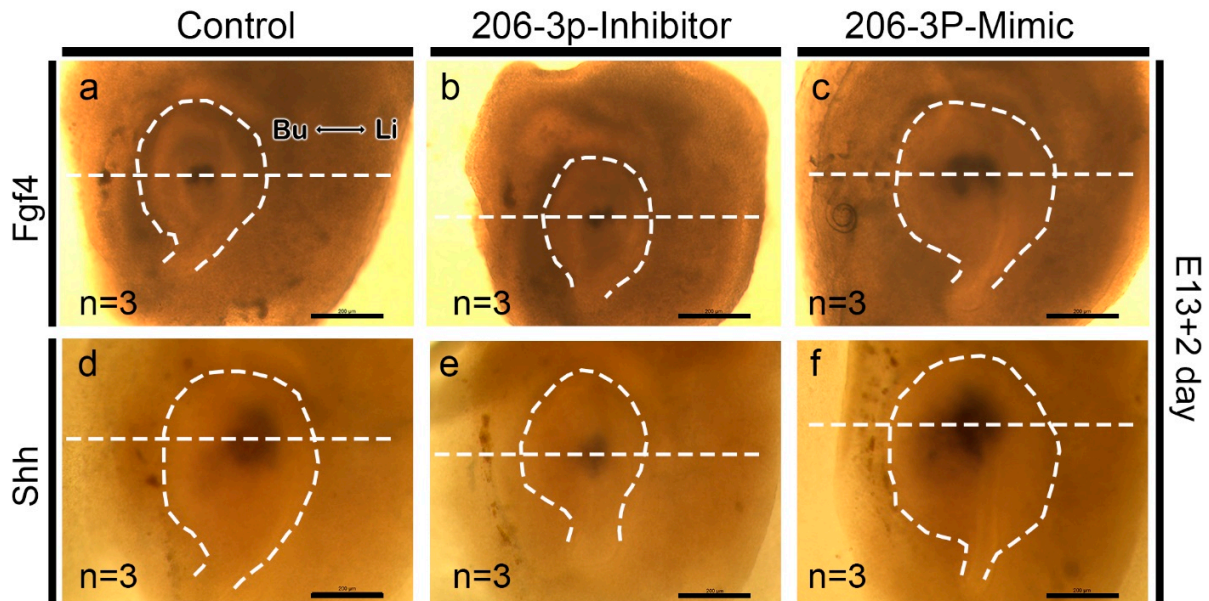

**Supplementary Figure S4. Whole-mount *in situ* hybridization.** Whole-mount *in situ* hybridization of *Fgf4* (a-c) and *Shh* (d-f) in E13 + 2 day–cultivated teeth (d-f). Dotted lines indicate the levels of the sections presented in Figure 3. The boundaries of tooth germs are indicated by the dotted lines (white). Bu; buccal, Li; lingual. *Scale bars* 200 μM.

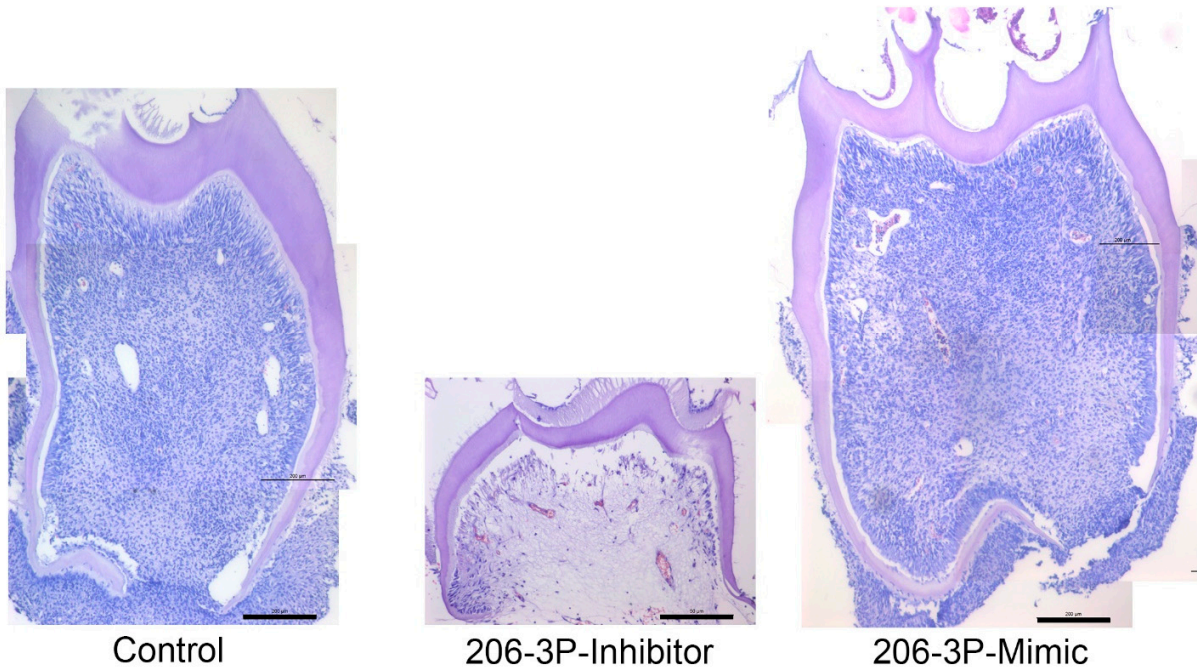

**Supplementary Figure S5. Lower magnification of H&E-stained histological sections of the renal-capsule-calcified teeth. Scale bars 200 μM**
